# Supplementary figures and images for: Cation-controlled assembly of Na+-linked lacunary α-Keggin tungstosilicates
Source: Royal Society of Chemistry journal article supplement (doi:10.1039/b514169a), 2005-11-28

# Spectra of Fundamental and SH Lights

Fundamental Second Harmonic

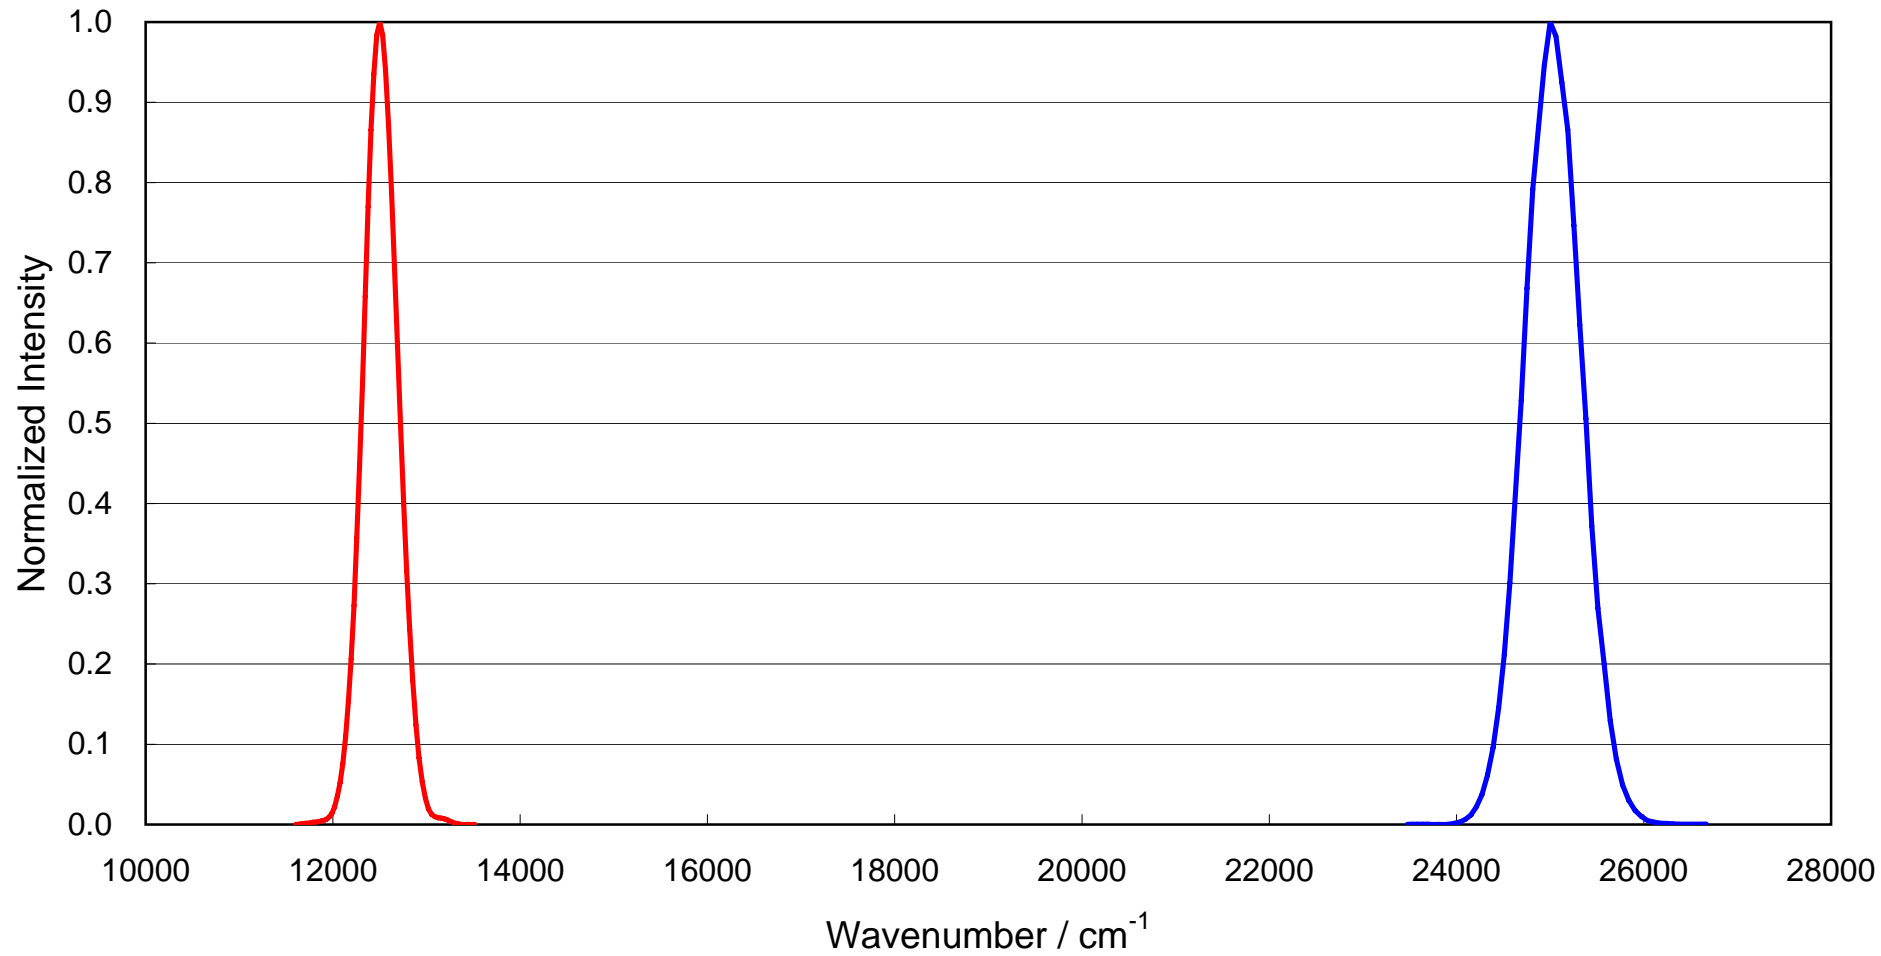

Supplement: b514169a.pdf [file b514169a.pdf]
